# Supplementary material
Source: Springer Nature journal article supplement (https://www.springermedizin.de/resource/supplementary/12865_2010_327_MOESM6_ESM.pdf/9427760)

**A)**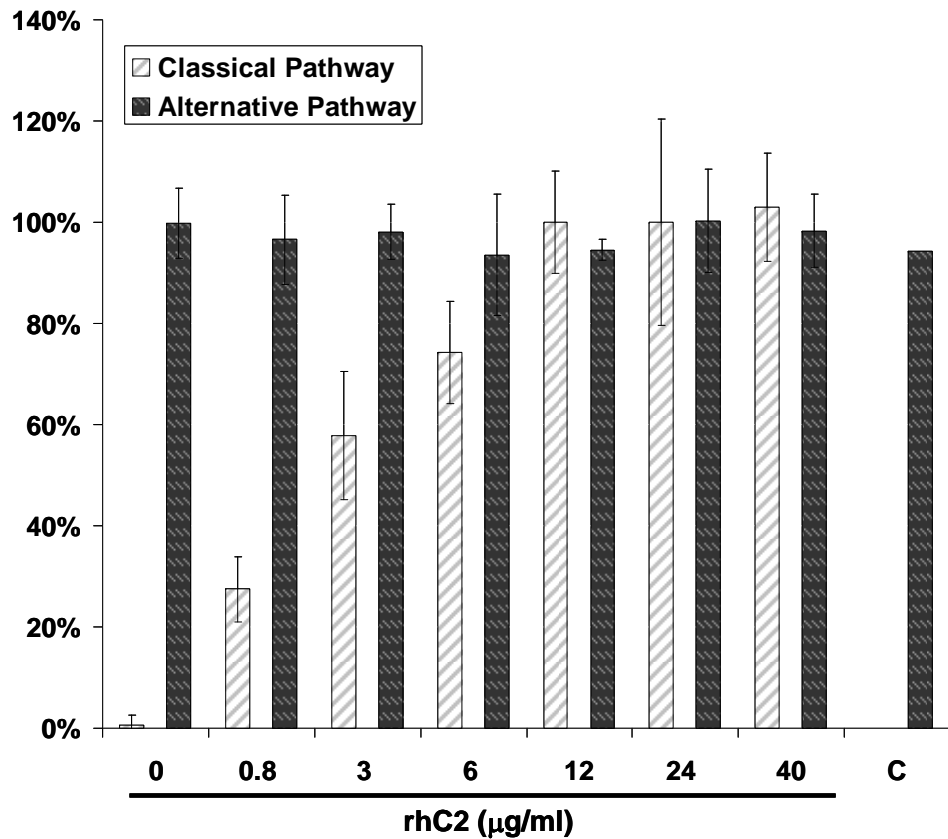**B)**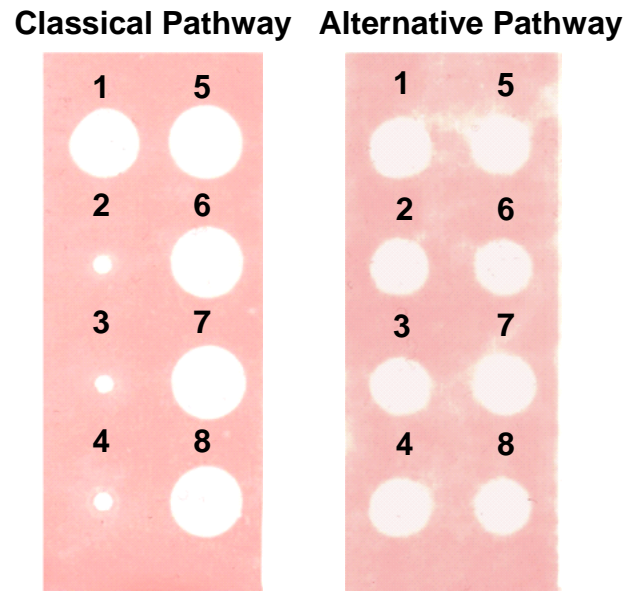

Supplement: MOESM6 [file 9427760]
